# Supplementary material for: Impact of Weight Change on Glycemic Control and Metabolic Parameters in T2D: A Retrospective US Study Based on Real-World Data
Source: Springer Nature journal article supplement (doi:10.1007/s13300-023-01511-4), 2023-12-01
Supplement: MOESM1 [file 26479372]

**Impact of Weight Change on Glycemic Control and Metabolic Parameters in T2D: A  
Retrospective US Study Based on Real-World Data**

Shraddha Shinde<sup>1</sup>, Vivian Thuyanh Thieu<sup>1</sup>, Anita YM Kwan<sup>1</sup>, Katherine Houghton<sup>2</sup>, Juliana Meyers<sup>3</sup>, David Schapiro<sup>1</sup>

1. Eli Lilly and Company, 893 S Delaware St., Indianapolis, IN 46285, USA
2. RTI Health Solutions, Wilmslow Road, Didsbury, Manchester, M20 2LS, United Kingdom
3. RTI Health Solutions, 3040, East Cornwallis Road, Research Triangle Park, NC 27709, USA

**Corresponding author:**

Shraddha Shinde

Eli Lilly and Company,

Lilly Corporate Center,

Indianapolis, IN 46285

USA

shinde\_shraddha@lilly.com

+1 (317) 2770976

## SUPPLEMENTAL DATA

**Table S1. Participant exclusion criteria**

| <b>Condition</b>                             |
|----------------------------------------------|
| Pregnancy                                    |
| Gestational diabetes                         |
| Human immunodeficiency virus                 |
| Cancer                                       |
| End-stage renal disease                      |
| Cachexia                                     |
| Anorexia                                     |
| Abnormal weight gain or loss                 |
| Feeding difficulties                         |
| Acute or chronic pancreatitis                |
| Celiac disease                               |
| Inflammatory bowel disease                   |
| Non-vitamin-related nutritional deficiencies |
| Cushing syndrome                             |
| Severe psychiatric disorders                 |

**Table S2. Interactive predictors of  $\geq 15\%$  and  $\geq 10\%$  weight loss at 1-year and 5-year follow-up**

| Variable <sup>a</sup>          | 1-Year Follow-up        |         |                         |         | 5-Year Follow-up         |         |                          |         |
|--------------------------------|-------------------------|---------|-------------------------|---------|--------------------------|---------|--------------------------|---------|
|                                | $\geq 15\%$ Weight Loss |         | $\geq 10\%$ Weight Loss |         | $\geq 15\%$ Weight Loss  |         | $\geq 10\%$ Weight Loss  |         |
|                                | OR (95% CI)             | p-value | OR (95% CI)             | p-value | OR (95% CI)              | p-value | OR (95% CI)              | p-value |
| Female/BMI <25/Age <65         | 1.82<br>(1.36 – 2.44)   | <0.001  | 1.80<br>(1.56 – 2.07)   | <0.001  | 1.65<br>(1.16 – 2.33)    | 0.005   | 1.48<br>(1.23 – 1.78)    | <0.001  |
| Female/BMI <25/Age 65–74       | 2.11<br>(1.58 – 2.82)   | <0.001  | 1.87<br>(1.62 – 2.15)   | <0.001  | 3.42<br>(2.52 – 4.64)    | <0.001  | 2.88<br>(2.45 – 3.38)    | <0.001  |
| Female/BMI <25/Age 75+         | 2.94<br>(2.21 – 3.91)   | <0.001  | 2.75<br>(2.39 – 3.16)   | <0.001  | 5.86<br>(4.25 – 8.08)    | <0.001  | 4.67<br>(3.91 – 5.58)    | <0.001  |
| Female/BMI 25 to <30/Age <65   | 3.48<br>(2.73 – 4.45)   | <0.001  | 2.68<br>(2.38 – 3.02)   | <0.001  | 3.23<br>(2.44 – 4.28)    | <0.001  | 2.70<br>(2.33 – 3.12)    | <0.001  |
| Female/BMI 25 to <30/Age 65–74 | 3.09<br>(2.41 – 3.96)   | <0.001  | 2.59<br>(2.29 – 2.92)   | <0.001  | 5.40<br>(4.10 – 7.11)    | <0.001  | 3.90<br>(3.38 – 4.51)    | <0.001  |
| Female/BMI 25 to <30/Age 75+   | 3.80<br>(2.94 – 4.91)   | <0.001  | 3.25<br>(2.87 – 3.69)   | <0.001  | 9.16<br>(6.89 – 12.18)   | <0.001  | 6.80<br>(5.83 – 7.92)    | <0.001  |
| Female/BMI 30 to <35/Age <65   | 5.01<br>(3.95 – 6.35)   | <0.001  | 3.38<br>(3.01 – 3.79)   | <0.001  | 5.92<br>(4.50 – 7.77)    | <0.001  | 4.19<br>(3.64 – 4.82)    | <0.001  |
| Female/BMI 30 to <35/Age 65–74 | 4.12<br>(3.23 – 5.26)   | <0.001  | 3.21<br>(2.85 – 3.61)   | <0.001  | 8.26<br>(6.29 – 10.85)   | <0.001  | 5.92<br>(5.14 – 6.82)    | <0.001  |
| Female/BMI 30 to <35/Age 75+   | 4.74<br>(3.66 – 6.13)   | <0.001  | 3.71<br>(3.26 – 4.22)   | <0.001  | 14.21<br>(10.70 – 18.88) | <0.001  | 9.51<br>(8.15 – 11.10)   | <0.001  |
| Female/BMI 35+/Age <65         | 10.17<br>(8.07 – 12.83) | <0.001  | 5.20<br>(4.65 – 5.82)   | <0.001  | 11.89<br>(9.09 – 15.53)  | <0.001  | 7.07<br>(6.16 – 8.11)    | <0.001  |
| Female/BMI 35+/Age 65–74       | 7.57<br>(5.98 – 9.59)   | <0.001  | 4.30<br>(3.83 – 4.83)   | <0.001  | 13.66<br>(10.43 – 17.89) | <0.001  | 8.89<br>(7.72 – 10.22)   | <0.001  |
| Female/BMI 35+/Age 75+         | 7.51<br>(5.82 – 9.68)   | <0.001  | 4.85<br>(4.26 – 5.52)   | <0.001  | 18.40<br>(13.80 – 24.52) | <0.001  | 12.71<br>(10.84 – 14.90) | <0.001  |
| Male/BMI <25/Age 65–74         | 1.56<br>(1.14 – 2.12)   | 0.005   | 1.29<br>(1.10 – 1.50)   | 0.001   | 2.24<br>(1.61 – 3.11)    | <0.001  | 1.97<br>(1.65 – 2.34)    | <0.001  |
| Male/BMI <25/Age 75+           | 1.68<br>(1.21 – 2.34)   | 0.002   | 1.63<br>(1.39 – 1.92)   | <0.001  | 2.90<br>(1.98 – 4.24)    | <0.001  | 2.63<br>(2.14 – 3.23)    | <0.001  |
| Male/BMI 25 to <30/Age <65     | 1.64<br>(1.28 – 2.10)   | <0.001  | 1.58<br>(1.41 – 1.78)   | <0.001  | 1.74<br>(1.31 – 2.30)    | <0.001  | 1.70<br>(1.47 – 1.96)    | <0.001  |

| Variable <sup>a</sup>        | 1-Year Follow-up       |         |                       |         | 5-Year Follow-up         |         |                         |         |
|------------------------------|------------------------|---------|-----------------------|---------|--------------------------|---------|-------------------------|---------|
|                              | ≥15% Weight Loss       |         | ≥10% Weight Loss      |         | ≥15% Weight Loss         |         | ≥10% Weight Loss        |         |
|                              | OR (95% CI)            | p-value | OR (95% CI)           | p-value | OR (95% CI)              | p-value | OR (95% CI)             | p-value |
| Male/BMI 25 to <30/Age 65–74 | 1.94<br>(1.51 – 2.48)  | <0.001  | 1.63<br>(1.44 – 1.84) | <0.001  | 2.68<br>(2.03 – 3.53)    | <0.001  | 2.43<br>(2.11 – 2.81)   | <0.001  |
| Male/BMI 25 to <30/Age 75+   | 2.38<br>(1.83 – 3.10)  | <0.001  | 2.11<br>(1.86 – 2.41) | <0.001  | 4.96<br>(3.70 – 6.63)    | <0.001  | 4.17<br>(3.58 – 4.87)   | <0.001  |
| Male/BMI 30 to <35/Age <65   | 3.16<br>(2.49 – 4.00)  | <0.001  | 2.32<br>(2.07 – 2.60) | <0.001  | 3.40<br>(2.59 – 4.46)    | <0.001  | 2.83<br>(2.46 – 3.25)   | <0.001  |
| Male/BMI 30 to <35/Age 65–74 | 3.14<br>(2.47 – 4.01)  | <0.001  | 2.39<br>(2.12 – 2.69) | <0.001  | 4.76<br>(3.62 – 6.25)    | <0.001  | 3.91<br>(3.39 – 4.50)   | <0.001  |
| Male/BMI 30 to <35/Age 75+   | 3.37<br>(2.59 – 4.39)  | <0.001  | 2.73<br>(2.39 – 3.11) | <0.001  | 7.53<br>(5.62 – 10.10)   | <0.001  | 5.76<br>(4.92 – 6.75)   | <0.001  |
| Male/BMI 35+/Age <65         | 8.62<br>(6.84 – 10.87) | <0.001  | 4.45<br>(3.98 – 4.98) | <0.001  | 9.20<br>(7.04 – 12.03)   | <0.001  | 5.73<br>(4.99 – 6.57)   | <0.001  |
| Male/BMI 35+/Age 65–74       | 7.04<br>(5.56 – 8.93)  | <0.001  | 4.03<br>(3.59 – 4.53) | <0.001  | 10.59<br>(8.07 – 13.89)  | <0.001  | 6.85<br>(5.95 – 7.89)   | <0.001  |
| Male/BMI 35+/Age 75+         | 8.25<br>(6.36 – 10.70) | <0.001  | 4.54<br>(3.95 – 5.21) | <0.001  | 16.88<br>(12.50 – 22.79) | <0.001  | 10.84<br>(9.13 – 12.87) | <0.001  |

Abbreviations: BMI, body mass index (kg/m<sup>2</sup>); CI, confidence intervals; OR, odds ratio (calculated based on logistic regression analysis).

<sup>a</sup>Reference for sex (male/female), BMI (kg/m<sup>2</sup>), and age (years) – male / BMI <25 kg/m<sup>2</sup> / age <65 years

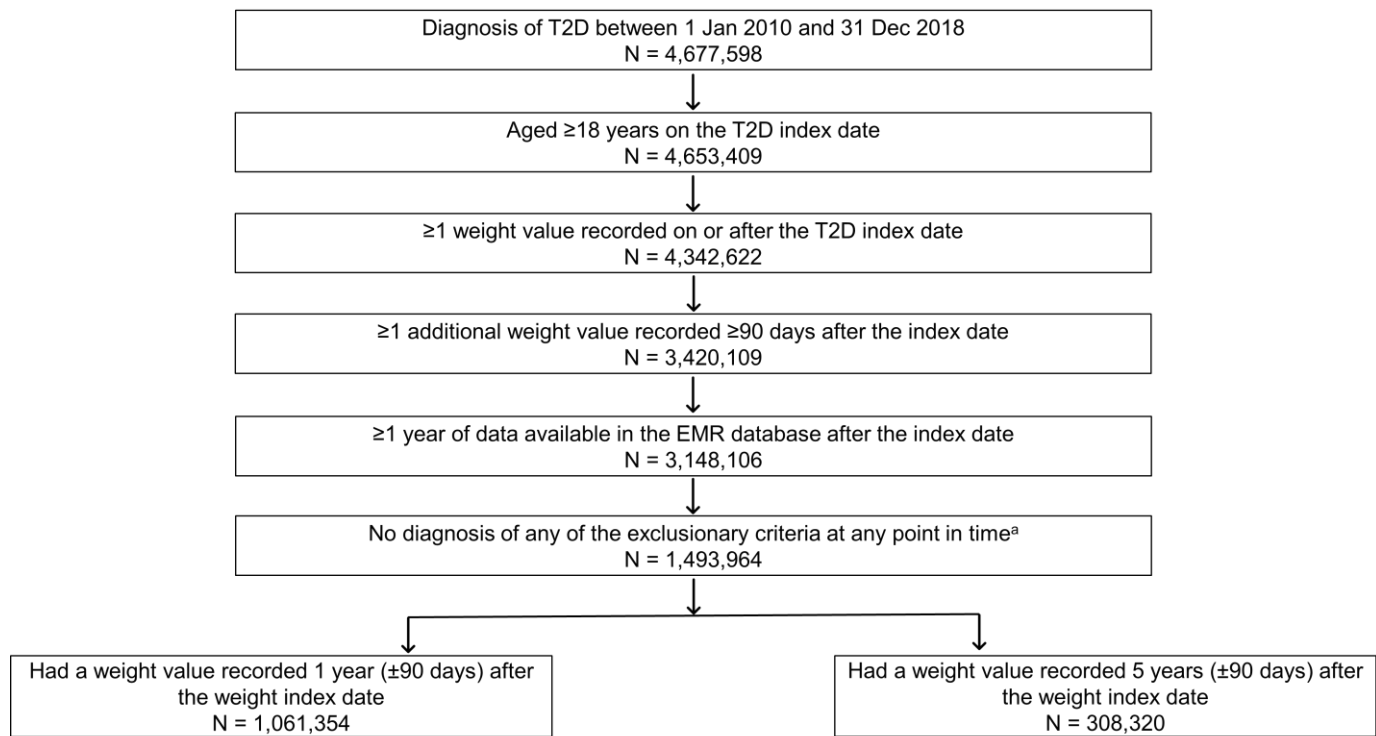

Abbreviations: EMR, electronic medical records; N; total number of participants; T2D, type 2 diabetes.

<sup>a</sup>Pregnancy, gestational diabetes, human immunodeficiency virus, cancer, end-stage renal disease, cachexia, anorexia, abnormal weight gain or loss, feeding difficulties, acute or chronic pancreatitis, celiac disease, inflammatory bowel disease, non-vitamin-related nutritional deficiencies, Cushing syndrome, and severe psychiatric disorders.

**Figure S1. Participant selection criteria**
